# Supplementary material for: Rapid kinetic evaluation of homogeneous single-site metallocene catalysts and cyclic diene: how do the catalytic activity, molecular weight, and diene incorporation rate of olefins affect each other?
Source: Royal Society of Chemistry journal article supplement (doi:10.1039/d1ra06243c), 2021-01-01
Supplement: d1ra06243c1.pdf [file d1ra06243c1.pdf]

*Submitted to RSC Advances.*

**Rapid kinetic evaluation of ansa-metallocene catalysts and cyclic diene (ENB): how do olefins catalytic activity, molecular weight, and diene incorporation rate affect each other?**

Amjad Ali<sup>1</sup>, Muhammad Nadeem<sup>2</sup>, Jinwei Lu<sup>1</sup>, Jamile Mohammadi Moradian<sup>1</sup>, Tahir Rasheed<sup>3</sup>, Tariq Aziz<sup>3</sup>, Chanez Maouche<sup>1</sup>, Yintian Guo<sup>3</sup>, Muhammad Awais<sup>5</sup>, Fan Zhiqiang<sup>3</sup>, Li Quo<sup>1\*</sup>

<sup>1</sup>Research School of Polymeric Materials Science & Engineering, Jiangsu University, Zhenjiang, 212013, PR China.

<sup>2</sup>Department of Environmental Engineering, Wuhang University of Technology, Wuhan, 430223, PR China.

<sup>3</sup>Interdisciplinary Research Center for Advanced Materials, King Fahd University of Petroleum and Minerals, Dhahran 31261, Saudi Arabia.

<sup>4</sup>MOE Key Laboratory of Macromolecular Synthesis and Functionalization, Department of Polymer Science and Engineering, Zhejiang University, Hangzhou, 310027, PR China.

<sup>5</sup>Research center of Fluid Machinery Engineering and Technology, Jiangsu University, Zhenjiang, 212013, PR China.

**\*Corresponding author:** E-mail address: [liguo@ujs.edu.cn](mailto:liguo@ujs.edu.cn) (Li Guo)

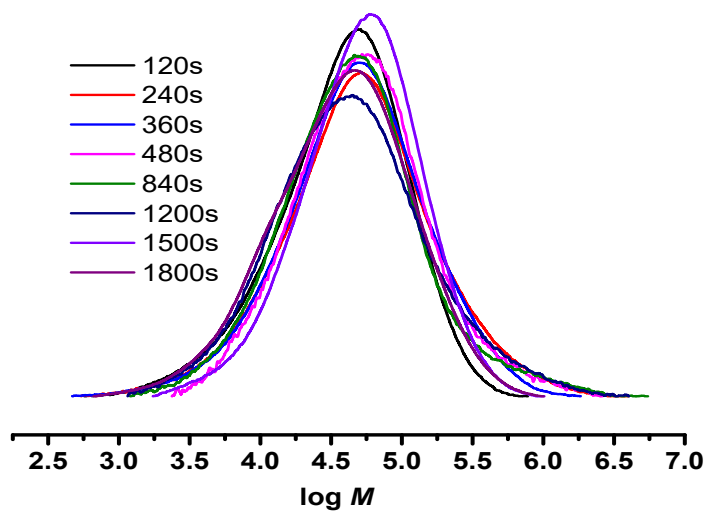

**Figure S1.** Change of molecular distribution of E/ENB copolymers with polymerization time

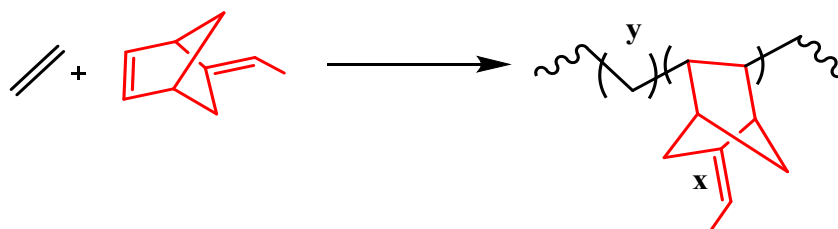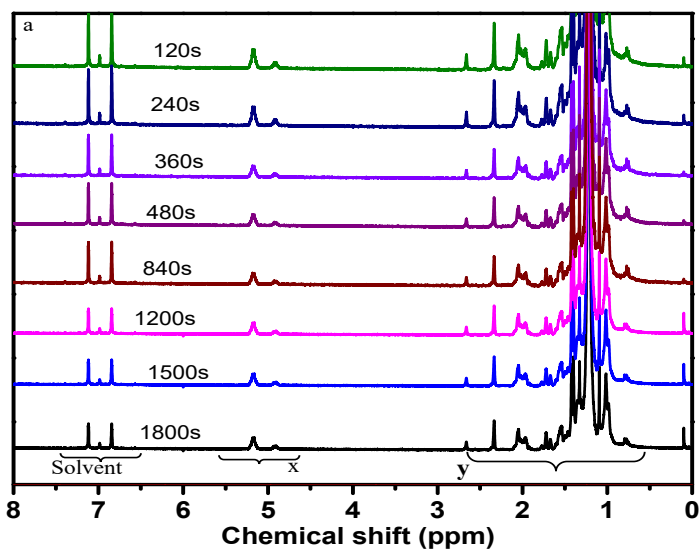

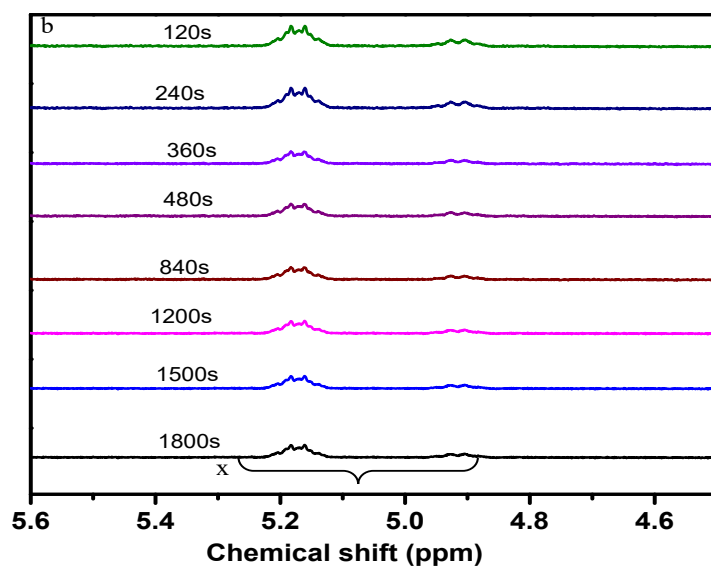

**Figure S2** HNMR Spectra's of the E/ENB copolymer

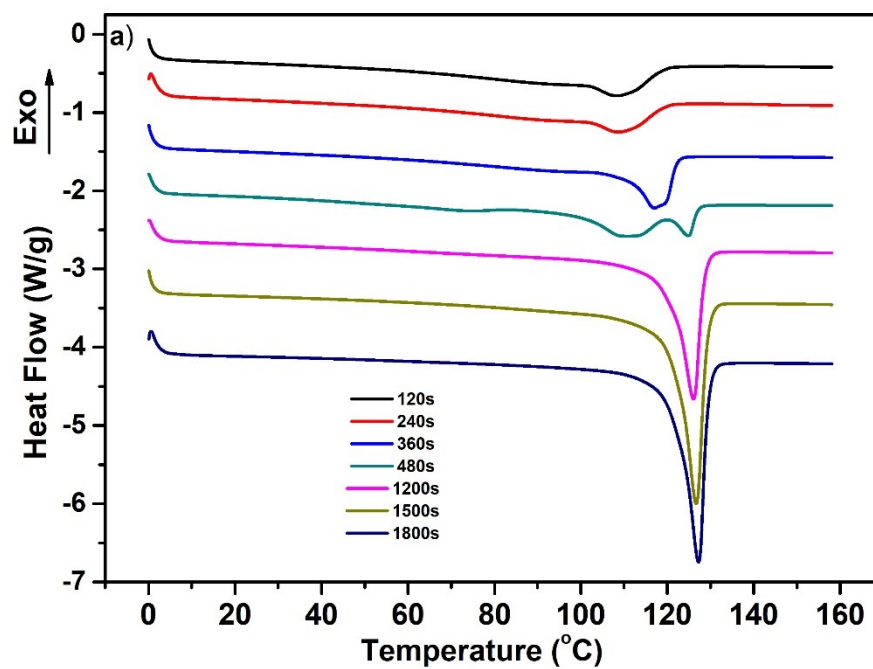

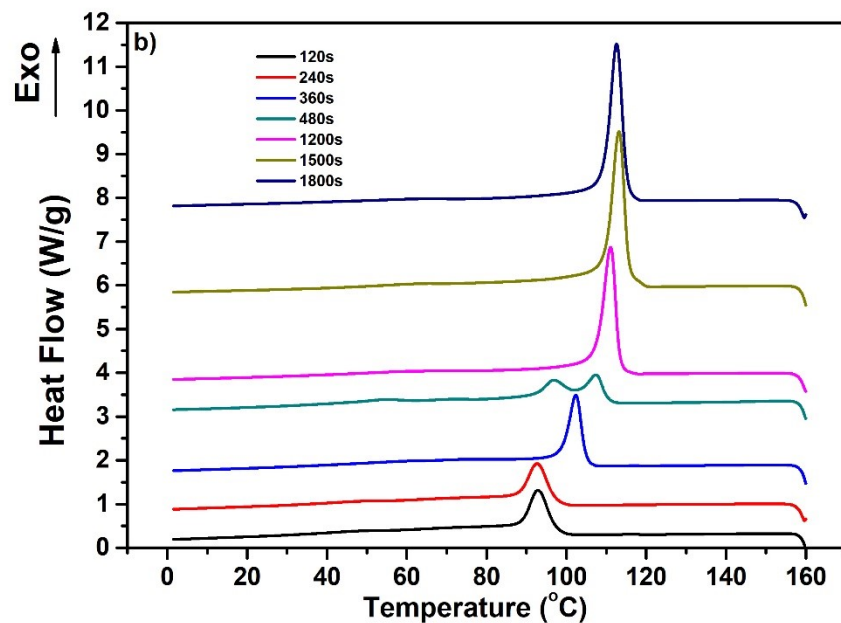

**Figure S3.** The DSC heating curve of ethylene-ENB copolymers with time.

**Table S1** Calculation for ENB

| RUN | Time | Yield | Enb in pol | S     | Enb in pol | $\text{mol}_{\text{ENB}}/\text{mol}_{\text{cat}}$ | $R_p^{\text{ENB}}/\text{mol}_{\text{cat}}$ | *C    | [ENB]  | $k_p^{\text{ENB}}$ |
|-----|------|-------|------------|-------|------------|---------------------------------------------------|--------------------------------------------|-------|--------|--------------------|
|     | see  | g     | mol%       | (ppm) | wt%        |                                                   | $\text{molENB}/\text{molcat s}$            | %     | mol/L  | L/mol s            |
| 1.1 | 120  | 0.47  | 5.10       | 9.80  | 18.7       | 586                                               | 3.21                                       | 16.43 | 0.0453 | 431                |
| 1.2 | 240  | 0.68  | 4.87       | 12.33 | 18.0       | 815                                               | 1.96                                       | 29.91 | 0.0396 | 165                |
| 1.3 | 360  | 0.87  | 4.61       | 12.47 | 17.2       | 995                                               | 1.14                                       | 45.38 | 0.0351 | 72                 |
| 1.4 | 480  | 1.09  | 3.97       | 14.06 | 15.1       | 1093                                              | 0.689                                      | 54.68 | 0.0327 | 38.6               |
| 1.5 | 840  | 1.44  | 3.43       | 14.68 | 13.2       | 1268                                              | 0.145                                      | 75.42 | 0.0283 | 6.79               |
| 1.6 | 1200 | 1.59  | 2.98       | 13.96 | 11.6       | 1233                                              | 0.0228                                     | 79.2  | 0.0292 | 0.987              |
| 1.7 | 1500 | 1.7   | 2.87       | 13.63 | 11.3       | 1274                                              | 0.0075                                     | 82.67 | 0.0282 | 0.322              |
| 1.8 | 1800 | 1.76  | 2.83       | 13.70 | 11.1       | 1302                                              | 0.00228                                    | 86.06 | 0.0275 | 0.0965             |

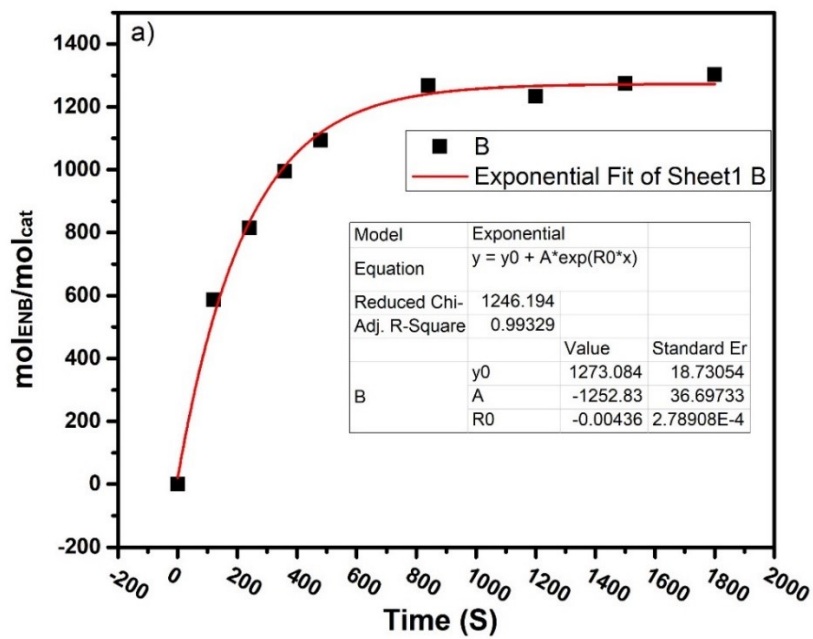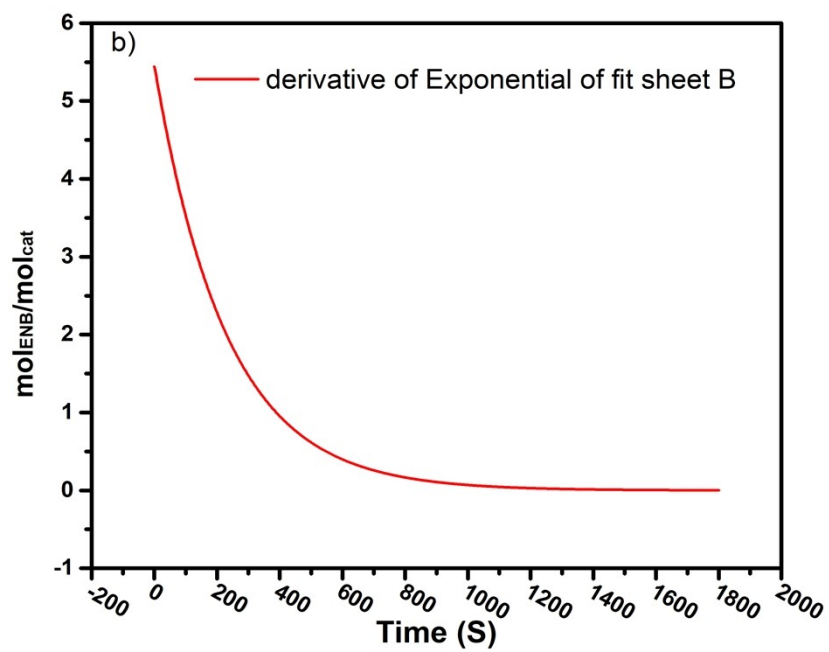

Figure S4. Plot of  $\text{mol}_{\text{ENB}}/\text{mol}_{\text{cat}}$  vs time, and Differentiate.

**Table S2** Calculation for ethylene

| RUN | Time | Yield | Enb in pol | S     | mE in pol | mol <sub>E</sub> /mol <sub>c</sub> | $R_p^E$ /mol <sub>cat</sub> | *C    | $k_p^E$ |
|-----|------|-------|------------|-------|-----------|------------------------------------|-----------------------------|-------|---------|
|     | see  | g     | wt%        | (ppm) | g         | at                                 | molENB/molcat s             | %     | L/mol s |
| 1.1 | 120  | 0.47  | 18.7       | 9.80  | 0.382     | 10911                              | 62.9                        | 16.43 | 9115    |
| 1.2 | 240  | 0.68  | 18.0       | 12.33 | 0.557     | 15928                              | 51.2                        | 29.91 | 4076    |
| 1.3 | 360  | 0.87  | 17.2       | 12.47 | 0.721     | 20587                              | 41.8                        | 45.38 | 2193    |
| 1.4 | 480  | 1.09  | 15.1       | 14.06 | 0.926     | 26449                              | 34                          | 54.68 | 1480    |
| 1.5 | 840  | 1.44  | 13.2       | 14.68 | 1.249     | 35700                              | 18.5                        | 75.42 | 584     |
| 1.6 | 1200 | 1.59  | 11.6       | 13.96 | 1.405     | 40137                              | 10                          | 79.2  | 301     |
| 1.7 | 1500 | 1.7   | 11.3       | 13.63 | 1.509     | 43104                              | 6.2                         | 82.67 | 179     |
| 1.8 | 1800 | 1.76  | 11.1       | 13.70 | 1.564     | 44698                              | 3.875                       | 86.06 | 107     |

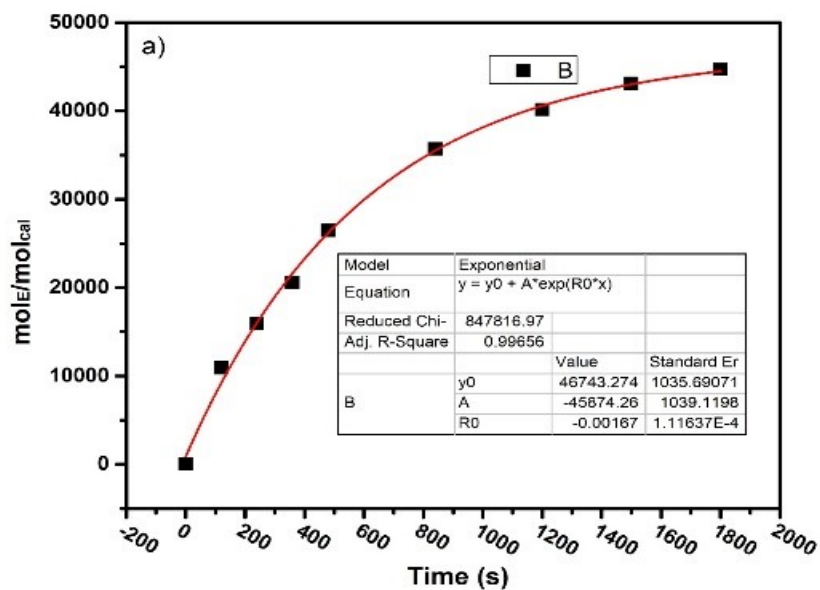

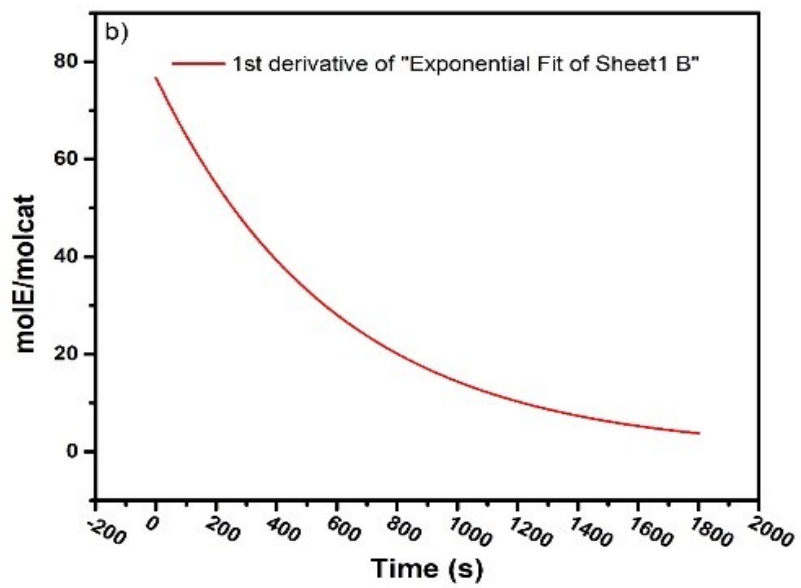

Figure S5. Plot  $\text{mol}_E/\text{mol}_{\text{cat}}$  vs time and differentiate.
